# Supplementary material
Source: Springer Nature journal article supplement (https://www.springermedizin.de/resource/supplementary/13002_2011_274_MOESM2_ESM.pdf/9627546)

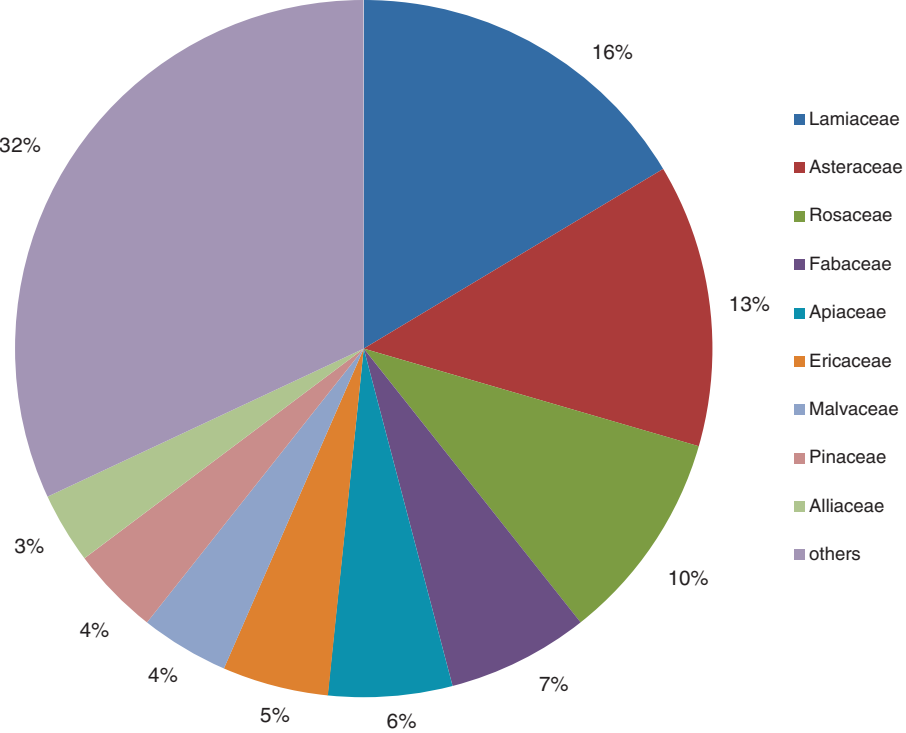

Supplement: MOESM2 [file 9627546]
